# Supplementary material for: The Characteristic Aroma Compounds of GABA Sun-Dried Green Tea and Raw Pu-Erh Tea Determined by Headspace Solid-Phase Microextraction Gas Chromatography–Mass Spectrometry and Relative Odor Activity Value
Source: MDPI journal article supplement (doi:10.3390/foods12244512), 2023-12-18
Supplement: s1 [file s1]

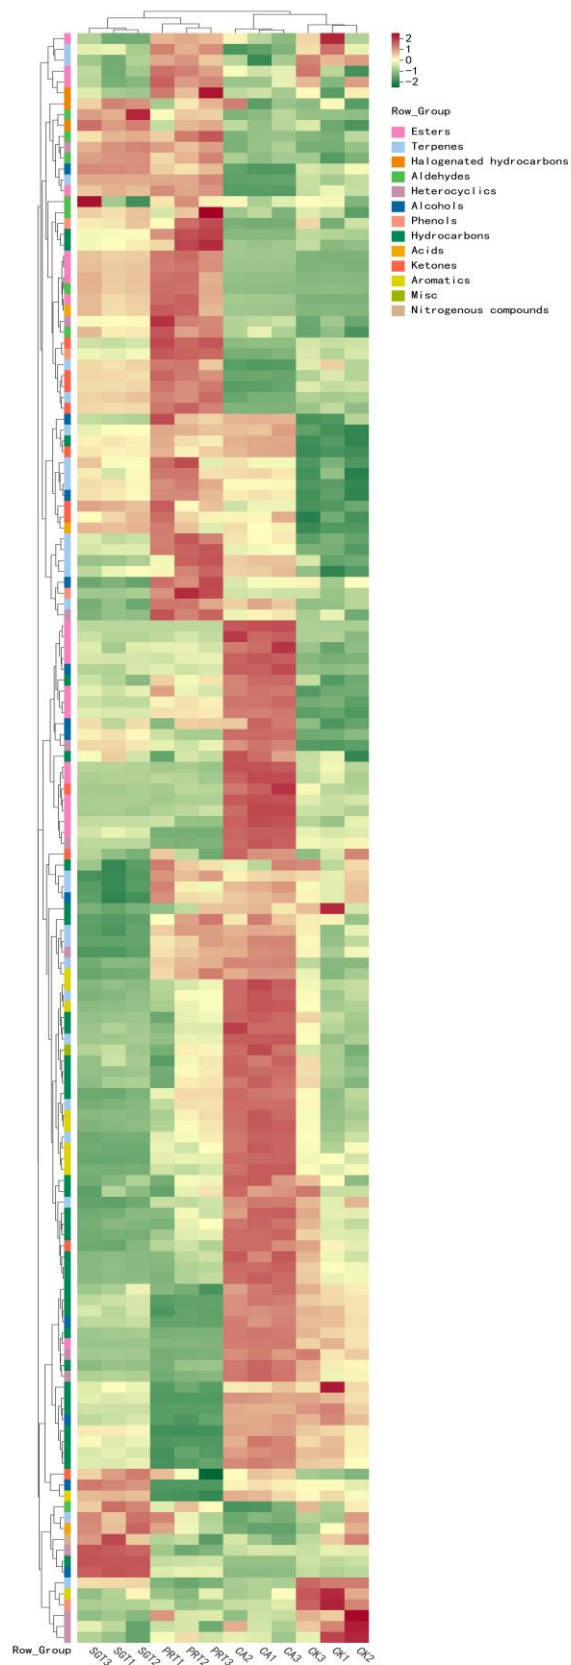

Figure S1. Heat map of volatile compounds, CK refers to fresh tea leaves, CA refers to anaerobic tea leaves, SGT refers to GABA sun-dried green tea and PRT refers to GABA raw Pu-erh tea. Each tea sample was measured in parallel for 3 times.
